# Supplementary material for: Roux-en-Y Gastric Bypass Compared to Glucagon-like Peptide-1 Receptor Agonists is Associated with Lower Out-of-Pocket Costs in Insured Patients with Type 2 Diabetes and Obesity
Source: Research Square preprint supplement (doi:10.21203/rs.3.rs-7623447/v1), 2025-11-13
Supplement: Supplementary file 1 [file 8a11acbb3b4664df7195c2f3.docx]

**Supplemental Table S2.** ICD-10 Diagnosis codes used to identify obesity-related co-morbidities

| **Variable** | **ICD-10 Diagnosis Codes** |
| --- | --- |
| Hypertension | I10.x, I15.x11 |
| Dyslipidemia | E78.x. 11 |
| Knee Osteoarthritis | M17.x12 |
| Obstructive Sleep Apnea | G47.3311 |
| Gastroesophageal Reflux Disease | K21 x13 |
| Metabolic dysfunction associated fatty liver disease/Metabolic dysfunction-associated steatohepatitis | K75.8, K76.014 |
