# Supplementary material for: Roux-en-Y Gastric Bypass Compared to Glucagon-like Peptide-1 Receptor Agonists is Associated with Lower Out-of-Pocket Costs in Insured Patients with Type 2 Diabetes and Obesity
Source: Research Square preprint supplement (doi:10.21203/rs.3.rs-7623447/v1), 2025-11-13
Supplement: Supplementary file 2 [file b529ba204efe50828589dcf1.docx]

**Table S1.** National Drug Codes used to Identify Semaglutide and Tirzepatide Prescriptions

| **Medication** | **National Drug Code** |
| --- | --- |
| Tirzepatide | |
| Mounjaro | 00002145701, 00002145780, 00002146001, 00002146080, 00002147101, 00002147180, 00002148401, 00002148480, 00002149501, 00002149580, 00002150601, 00002150680 |
| Zepbound | 00002245701, 00002245780, 00002246001, 00002246080, 00002247101, 00002247180, 00002248401, 00002248480, 00002249501, 00002249580, 00002250601, 00002250680 |
| Semaglutide | |
| Ozempic | 00169413001, 00169413013, 00169413211, 00169413212, 00169413602, 00169418113, 00169477211, 00169477212, 00169477297 , 50090594900, 50090605100 |
| Rybelsus | 00169430313, 00169430330, 00169430713, 00169430730, 00169431413, 00169431430 |
| Wegovy | 00169450114, 00169450514, 00169451714, 00169452414, 00169452514, 50090582400 |
